# Supplementary material
Source: Royal Society of Chemistry journal article supplement (doi:10.1039/d6fo00080k)

## Supplementary material

**Supplemental Table 1.** Components and scoring criteria of the Alternate Mediterranean Diet (AMED) score.

**Supplemental Table 2.** Definitions and classifications of covariates included in the multivariable Cox proportional hazards models.

**Supplemental Table 3.** Assessment of multicollinearity.

**Supplemental Table 4.** Schoenfeld residuals test for the proportional hazards assumption.

**Supplemental Table 5.** Baseline characteristics of incident lung cancer cases according to quartiles of Alternate Mediterranean Diet (AMED) score.

**Supplemental Table 6.** Interaction analyses of Mediterranean diet adherence and polyunsaturated fatty acid intake.

**Supplemental Table 7.** Association of Mediterranean diet and PUFAs intake with lung cancer outcomes (including participants with moderate AMED adherence).

**Supplemental Table 8.** Association between Mediterranean diet and lung cancer outcomes (restricting the dataset to participants who provided at least two 24-hour dietary recalls).

**Supplemental Table 9.** Associations between isocaloric substitution of saturated fatty acids with unsaturated fatty acids and lung cancer outcomes (restricting the dataset to participants who provided at least two 24-hour dietary recalls).

**Supplemental Table 10.** Association of Mediterranean diet and PUFAs intake with lung cancer outcomes (restricting the dataset to participants who provided at least two 24-hour dietary recalls).

**Supplemental Table 11.** Association between Mediterranean diet and lung cancer outcomes (excluding participants with missing covariate data).

**Supplemental Table 12.** Associations between isocaloric substitution of saturated fatty acids with unsaturated fatty acids and lung cancer outcomes (excluding participants with missing covariate data).

**Supplemental Table 13.** Association of Mediterranean diet and PUFAs intake with lung cancer outcomes (excluding participants with missing covariate data).

**Supplemental Table 14.** Association between Mediterranean diet and lung cancer outcomes (excluding participants with less than one year of follow-up).

**Supplemental Table 15.** Associations between isocaloric substitution of saturated fatty acids with unsaturated fatty acids and lung cancer outcomes (excluding participants with less than one year of follow-up).

**Supplemental Table 16.** Association of Mediterranean diet and PUFAs intake with lung cancer outcomes (excluding participants with less than one year of follow-up).

**Supplemental Table 17.** Baseline characteristics of the analytic cohort compared with excluded participants.

**Supplemental Table 18.** Association between Mediterranean diet and lung cancer outcomes (inverse probability weighting-adjusted for selection bias between included and excluded participants).

**Supplemental Table 19.** Associations between isocaloric substitution of saturated fatty acids with unsaturated fatty acids and lung cancer outcomes (inverse probability weighting-adjusted for selection bias between included and excluded participants).

**Supplemental Table 20.** Association of Mediterranean diet and PUFAs intake with lung cancer outcomes (inverse probability weighting-adjusted for selection bias between included and excluded participants).

**Supplemental Table 21.** Association between Mediterranean diet and lung cancer outcomes (competing risk analyses utilizing the Fine-Gray subdistribution hazard model).

**Supplemental Table 22.** Associations between isocaloric substitution of saturated fatty acids with unsaturated fatty acids and lung cancer outcomes (competing risk analyses utilizing the Fine-Gray subdistribution hazard model).

**Supplemental Table 23.** Association of Mediterranean diet and PUFAs intake with lung cancer outcomes (competing risk analyses utilizing the Fine-Gray subdistribution hazard model).

**Supplemental Table 24.** Associations between total fat and fat subtypes and lung cancer outcomes (further adjusted for other dietary components).

**Supplemental Table 25.** Associations between isocaloric substitution of saturated fatty acids with unsaturated fatty acids and lung cancer outcomes (further adjusted for other dietary components).

**Supplemental Table 26.** Stratified analyses by key factors.

**Supplemental Figure 1.** Flowchart of study participants from the UK Biobank.

**Supplemental Table 1.** Components and scoring criteria of the Alternate Mediterranean Diet (AMED) score.

| <b>Component</b>          | <b>Food</b>                                                                                                                                                                                                                   | <b>1 point for individuals who meet each standard</b> |
|---------------------------|-------------------------------------------------------------------------------------------------------------------------------------------------------------------------------------------------------------------------------|-------------------------------------------------------|
| 1. Vegetables             | Coleslaw, Side salad, Avocado, Beetroot, Broccoli, Butternut squash, Cabbage/kale, Carrot, Cauliflower, Celery, Courgette, Cucumber, Garlic, Leek, Lettuce, Mushroom, Onion, Parsnip, Sweet pepper, Spinach, Other vegetables | Above or equal to the sex-specific median             |
| 2. Legumes                | Baked bean, Pulses, Broad bean, Tofu                                                                                                                                                                                          | Above or equal to the sex-specific median             |
| 3. Fruits                 | Fruit juice, Stewed fruit, Prune, Dried fruit, Mixed fruit, Apple, Banana, Berry, Cherry, Grape, Mango, Melon, Orange, Satsuma, Other fruit                                                                                   | Above or equal to the sex-specific median             |
| 4. Nuts                   | Salted peanuts, Unsalted peanuts, Salted nuts, Unsalted nuts, Seeds                                                                                                                                                           | Above or equal to the sex-specific median             |
| 5. Whole grains           | Muesli, Oat crunch, Sweetened cereal, Plain cereal, Bran cereal, Whole-wheat cereal, Other cereal, Oatcakes, Wholemeal pasta, Brown rice, Couscous, Cereal bar                                                                | Above or equal to the sex-specific median             |
| 6. Fish                   | Tinned tuna, Oily fish, Breaded fish, Battered fish, White fish, Prawns, Lobster/crab, Shellfish, Other fish                                                                                                                  | Above or equal to the sex-specific median             |
| 7. MUFA/SFA ratio         | Monounsaturated fatty acids, Saturated fatty acids                                                                                                                                                                            | Above or equal to the sex-specific median             |
| 8. Red and processed meat | Sausage, Beef, Pork, Lamb, Bacon, Ham, Liver                                                                                                                                                                                  | Below the sex-specific median                         |
| 9. Alcohol                | Alcohol                                                                                                                                                                                                                       | 5-15 g/d for women and 10-25 g/d for men              |
| Total score               |                                                                                                                                                                                                                               | 0-9 points total                                      |

**Supplemental Table 2.** Definitions and classifications of covariates included in the multivariable Cox proportional hazards models.

| <b>Variables</b>                     | <b>Categorization</b>                                                                                                                                                                                                                                                     | <b>UK Biobank variable description and data-field ID</b>                                                                                                                                                                                                                                                                                    |
|--------------------------------------|---------------------------------------------------------------------------------------------------------------------------------------------------------------------------------------------------------------------------------------------------------------------------|---------------------------------------------------------------------------------------------------------------------------------------------------------------------------------------------------------------------------------------------------------------------------------------------------------------------------------------------|
| Age, Age at diagnosis                | Continuous: age at diagnosis was computed as age when attended assessment centre minus years since lung cancer diagnosis                                                                                                                                                  | Age when attended assessment centre (ID: 21003)                                                                                                                                                                                                                                                                                             |
| Sex                                  | Female; Male                                                                                                                                                                                                                                                              | Sex (ID: 31)                                                                                                                                                                                                                                                                                                                                |
| Ethnicity                            | White; Non-White; Unknown                                                                                                                                                                                                                                                 | Ethnic background (ID: 21000)                                                                                                                                                                                                                                                                                                               |
| Townsend deprivation index           | Continuous                                                                                                                                                                                                                                                                | Townsend deprivation index (ID: 189)                                                                                                                                                                                                                                                                                                        |
| Education level                      | College or above: college or university degree; High school or equivalent: A-levels, AS-levels or equivalent, O-levels, GCSEs or equivalent, CSEs or equivalent, NVQ, HND, HNC or equivalent, other professional qualifications; Less than high school: none of the above | Qualifications (ID: 6138)                                                                                                                                                                                                                                                                                                                   |
| Smoking status                       | Never smokers: individuals who have never smoked or have smoked fewer than 100 cigarettes in their lifetime; Ever smokers: individuals who have smoked at least 100 cigarettes in their lifetime; Unknown                                                                 | Current tobacco smoking (ID: 1239); Past tobacco smoking (ID: 1249); Light smokers, at least 100 smokes in lifetime (ID: 2644)                                                                                                                                                                                                              |
| Alcohol consumption                  | Never or moderate: up to 1 drink/day (14g/day) for women, or up to 2 drinks/day (28g/day) for men; Excessive: more than 1 drink/day (14g/day) for women, or more than 2 drinks/day (28g/day) for men; Unknown                                                             | Alcohol intake frequency (ID:1558); Average weekly/monthly red wine intake (ID:1568/ID:4407); Average weekly/monthly white wine intake (ID:1578/ID:4418); Average weekly/monthly beer intake (ID: 1588/ID:4429); Average weekly/monthly spirits intake (ID: 4440/ ID:1598); Average weekly/monthly fortified wine intake (ID:1608/ ID:4451) |
| Physical activity level <sup>1</sup> | Insufficiently active: < 600 MET-min/week; Sufficiently active: ≥ 600 MET-min/week; Unknown                                                                                                                                                                               | Summed MET minutes per week for all activity (ID: 22040)                                                                                                                                                                                                                                                                                    |
| Body mass index                      | Continuous                                                                                                                                                                                                                                                                | Body mass index(ID: 21001)                                                                                                                                                                                                                                                                                                                  |
| Family history of lung cancer        | No: either mother, father, or one of the siblings have a history of lung cancer; Yes: neither parents nor siblings have a history of lung cancer                                                                                                                          | Illness of mother (ID: 20110); Illness of Father (ID: 20107)                                                                                                                                                                                                                                                                                |
| Histological type                    | Small cell lung cancer; Non-small cell lung cancer; Unknown                                                                                                                                                                                                               | Histology of cancer tumour (ID: 40011)                                                                                                                                                                                                                                                                                                      |
| Energy intake                        | Continuous: energy intake (kcal/day) of mean value across dietary assessments 1-5; energy intake (kcal/day) = energy intake (kJ/day) * 0.2389                                                                                                                             | Energy (ID: 26002)                                                                                                                                                                                                                                                                                                                          |

## Reference

1. World Health Organization. WHO guidelines on physical activity and sedentary behaviour. Geneva: WHO; 2020.

**Supplemental Table 3.** Assessment of multicollinearity.

(A) Alternate Mediterranean Diet (AMED) score

|                            | Lung cancer risk |    |              | Lung cancer mortality |    |              | Lung cancer survival |    |              |
|----------------------------|------------------|----|--------------|-----------------------|----|--------------|----------------------|----|--------------|
|                            | GVIF             | Df | GVIF^(1/2Df) | GVIF                  | Df | GVIF^(1/2Df) | GVIF                 | Df | GVIF^(1/2Df) |
| <b>AMED</b>                | 1.076044         | 1  | 1.037326     | 1.076601              | 1  | 1.037594     | 1.086808             | 1  | 1.042501     |
| <b>Age</b>                 | 1.076236         | 1  | 1.037418     | 1.071947              | 1  | 1.035349     | 1.079315             | 1  | 1.038901     |
| <b>Sex</b>                 | 1.144420         | 1  | 1.069776     | 1.144760              | 1  | 1.069934     | 1.149153             | 1  | 1.071986     |
| <b>Ethnicity</b>           | 1.028604         | 1  | 1.014201     | 1.023599              | 1  | 1.011731     | 1.058301             | 1  | 1.028738     |
| <b>Education</b>           | 1.105618         | 2  | 1.025419     | 1.103697              | 2  | 1.024973     | 1.122867             | 2  | 1.029395     |
| <b>TDI</b>                 | 1.050347         | 1  | 1.024865     | 1.048323              | 1  | 1.023876     | 1.101975             | 1  | 1.049750     |
| <b>Smoking</b>             | 1.035239         | 1  | 1.017467     | 1.026599              | 1  | 1.013212     | 1.076962             | 1  | 1.037768     |
| <b>Physical activities</b> | 1.027448         | 1  | 1.013631     | 1.026964              | 1  | 1.013392     | 1.036706             | 1  | 1.018187     |
| <b>BMI</b>                 | 1.058216         | 1  | 1.028696     | 1.055372              | 1  | 1.027313     | 1.053746             | 1  | 1.026521     |
| <b>Family cancer</b>       | 1.012560         | 1  | 1.006260     | 1.013272              | 1  | 1.006614     | 1.029752             | 1  | 1.014767     |
| <b>Energy</b>              | 1.149025         | 1  | 1.071926     | 1.151621              | 1  | 1.073136     | 1.133533             | 1  | 1.064675     |
| <b>Histological type</b>   | -                | -  | -            | -                     | -  | -            | 1.029501             | 1  | 1.014643     |

(B) Isocaloric substitution of saturated fatty acids with unsaturated fatty acids

|                             | Lung cancer risk |    |              | Lung cancer mortality |    |              | Lung cancer survival |    |              |
|-----------------------------|------------------|----|--------------|-----------------------|----|--------------|----------------------|----|--------------|
|                             | GVIF             | Df | GVIF^(1/2Df) | GVIF                  | Df | GVIF^(1/2Df) | GVIF                 | Df | GVIF^(1/2Df) |
| <b>PUFA energy%</b>         | 2.007499         | 1  | 1.416862     | 1.999834              | 1  | 1.414155     | 2.097030             | 1  | 1.448113     |
| <b>MUFA energy%</b>         | 8.162007         | 1  | 2.856923     | 8.169328              | 1  | 2.858204     | 8.495296             | 1  | 2.914669     |
| <b>Trans energy%</b>        | 2.529621         | 1  | 1.590478     | 2.541118              | 1  | 1.594089     | 2.687422             | 1  | 1.639336     |
| <b>Carbohydrate energy%</b> | 16.974358        | 1  | 4.119995     | 17.034048             | 1  | 4.127233     | 17.805490            | 1  | 4.219655     |
| <b>Protein energy%</b>      | 3.838605         | 1  | 1.959236     | 3.699929              | 1  | 1.923520     | 3.836012             | 1  | 1.958574     |
| <b>Alcohol energy%</b>      | 13.348910        | 1  | 3.653616     | 13.870183             | 1  | 3.724269     | 14.484223            | 1  | 3.805814     |
| <b>Age</b>                  | 1.079452         | 1  | 1.038967     | 1.075366              | 1  | 1.036999     | 1.090756             | 1  | 1.044393     |
| <b>Sex</b>                  | 1.179126         | 1  | 1.085876     | 1.179730              | 1  | 1.086154     | 1.168259             | 1  | 1.080860     |
| <b>Ethnicity</b>            | 1.036896         | 1  | 1.018281     | 1.030927              | 1  | 1.015346     | 1.063273             | 1  | 1.031152     |
| <b>Education</b>            | 1.099384         | 2  | 1.02397      | 1.098507              | 2  | 1.023766     | 1.132091             | 2  | 1.031503     |
| <b>TDI</b>                  | 1.051218         | 1  | 1.025289     | 1.049170              | 1  | 1.024290     | 1.108582             | 1  | 1.052892     |
| <b>Smoking</b>              | 1.061360         | 1  | 1.030223     | 1.045339              | 1  | 1.022418     | 1.106343             | 1  | 1.051829     |
| <b>Drinking</b>             | 1.420465         | 1  | 1.191833     | 1.424063              | 1  | 1.193341     | 1.501713             | 1  | 1.225444     |
| <b>Physical activities</b>  | 1.027472         | 1  | 1.013643     | 1.027231              | 1  | 1.013524     | 1.041175             | 1  | 1.020380     |
| <b>BMI</b>                  | 1.069413         | 1  | 1.034124     | 1.066865              | 1  | 1.032891     | 1.079547             | 1  | 1.039012     |
| <b>Family cancer</b>        | 1.012615         | 1  | 1.006288     | 1.013308              | 1  | 1.006632     | 1.039055             | 1  | 1.019341     |
| <b>Energy</b>               | 1.264752         | 1  | 1.124612     | 1.261346              | 1  | 1.123097     | 1.291396             | 1  | 1.136396     |
| <b>Histological type</b>    | -                | -  | -            | -                     | -  | -            | 1.035419             | 1  | 1.017556     |

(C) Cross classification of Mediterranean diet and PUFAs intake

|                  | Lung cancer risk |    |              | Lung cancer mortality |    |              | Lung cancer survival |    |              |
|------------------|------------------|----|--------------|-----------------------|----|--------------|----------------------|----|--------------|
|                  | GVIF             | Df | GVIF^(1/2Df) | GVIF                  | Df | GVIF^(1/2Df) | GVIF                 | Df | GVIF^(1/2Df) |
| <b>AMED_PUFA</b> | 1.092905         | 7  | 1.006366     | 1.090259              | 7  | 1.006192     | 1.186163             | 7  | 1.012269     |

|                            |          |   |          |          |   |          |          |   |          |
|----------------------------|----------|---|----------|----------|---|----------|----------|---|----------|
| <b>Age</b>                 | 1.076168 | 1 | 1.037385 | 1.071721 | 1 | 1.035239 | 1.077261 | 1 | 1.037912 |
| <b>Sex</b>                 | 1.159183 | 1 | 1.076653 | 1.160550 | 1 | 1.077288 | 1.167994 | 1 | 1.080738 |
| <b>Ethnicity</b>           | 1.028927 | 1 | 1.01436  | 1.023909 | 1 | 1.011884 | 1.060899 | 1 | 1.029999 |
| <b>Education</b>           | 1.104324 | 2 | 1.025119 | 1.101820 | 2 | 1.024537 | 1.159856 | 2 | 1.03777  |
| <b>TDI</b>                 | 1.050009 | 1 | 1.024699 | 1.047793 | 1 | 1.023618 | 1.107977 | 1 | 1.052605 |
| <b>Smoking</b>             | 1.035093 | 1 | 1.017395 | 1.026464 | 1 | 1.013146 | 1.077536 | 1 | 1.038044 |
| <b>Physical activities</b> | 1.027797 | 1 | 1.013803 | 1.027149 | 1 | 1.013484 | 1.048007 | 1 | 1.023722 |
| <b>BMI</b>                 | 1.059275 | 1 | 1.029211 | 1.056487 | 1 | 1.027855 | 1.057712 | 1 | 1.028451 |
| <b>Family cancer</b>       | 1.012714 | 1 | 1.006337 | 1.013433 | 1 | 1.006694 | 1.037882 | 1 | 1.018765 |
| <b>Energy</b>              | 1.159785 | 1 | 1.076933 | 1.160848 | 1 | 1.077427 | 1.157629 | 1 | 1.075932 |
| <b>Histological type</b>   | -        | - | -        | -        | - | -        | 1.037189 | 1 | 1.018425 |

For the lung cancer survival analysis, age was defined as age at diagnosis, and additionally adjusted for histological type.

$\text{GVIF}^{(1/2\text{Df})} < 5$  was considered indicative of no severe multicollinearity.

Abbreviations: GVIF, generalized variance inflation factor.

#### Supplemental Table 4. Schoenfeld residuals test for the proportional hazards assumption.

##### (A) Alternate Mediterranean Diet (AMED) score

|                            | Lung cancer risk | Lung cancer mortality | Lung cancer survival |
|----------------------------|------------------|-----------------------|----------------------|
|                            | <i>P</i> value   |                       |                      |
| <b>AMED</b>                | 0.11             | 0.90                  | 0.31                 |
| <b>Age</b>                 | 0.99             | 0.64                  | 0.42                 |
| <b>Sex</b>                 | 0.77             | 0.11                  | 0.56                 |
| <b>Ethnicity</b>           | 0.17             | 0.39                  | 0.09                 |
| <b>Education</b>           | 0.58             | 0.72                  | 0.22                 |
| <b>TDI</b>                 | 0.60             | 0.83                  | 0.18                 |
| <b>Smoking</b>             | 0.11             | 0.67                  | 0.13                 |
| <b>Physical activities</b> | 0.22             | 0.46                  | 0.83                 |
| <b>BMI</b>                 | 0.32             | 0.24                  | 0.20                 |
| <b>Family cancer</b>       | 0.49             | 0.96                  | 0.39                 |
| <b>Energy</b>              | 0.27             | 0.33                  | 0.42                 |
| <b>Histological type</b>   | -                | -                     | 0.12                 |
| <b>Global</b>              | 0.28             | 0.64                  | 0.28                 |

##### (B) Isocaloric substitution of saturated fatty acids with unsaturated fatty acids

|                             | Lung cancer risk | Lung cancer mortality | Lung cancer survival |
|-----------------------------|------------------|-----------------------|----------------------|
|                             | <i>P</i> value   |                       |                      |
| <b>PUFA energy%</b>         | 0.39             | 0.27                  | 0.60                 |
| <b>MUFA energy%</b>         | 0.69             | 0.49                  | 0.87                 |
| <b>Trans energy%</b>        | 0.06             | 0.13                  | 0.71                 |
| <b>Carbohydrate energy%</b> | 0.88             | 0.21                  | 0.08                 |
| <b>Protein energy%</b>      | 0.71             | 0.55                  | 0.3                  |
| <b>Alcohol energy%</b>      | 0.37             | 0.7                   | 0.23                 |
| <b>Age</b>                  | 1.00             | 0.64                  | 0.48                 |
| <b>Sex</b>                  | 0.77             | 0.11                  | 0.53                 |

|                            |      |      |      |
|----------------------------|------|------|------|
| <b>Ethnicity</b>           | 0.17 | 0.4  | 0.09 |
| <b>Education</b>           | 0.58 | 0.71 | 0.19 |
| <b>TDI</b>                 | 0.59 | 0.83 | 0.21 |
| <b>Smoking</b>             | 0.11 | 0.67 | 0.13 |
| <b>Drinking</b>            | 0.71 | 0.87 | 0.48 |
| <b>Physical activities</b> | 0.22 | 0.45 | 0.82 |
| <b>BMI</b>                 | 0.32 | 0.24 | 0.21 |
| <b>Family cancer</b>       | 0.49 | 0.96 | 0.43 |
| <b>Energy</b>              | 0.29 | 0.34 | 0.43 |
| <b>Histological type</b>   | -    | -    | 0.09 |
| <b>Global</b>              | 0.37 | 0.35 | 0.15 |

(C) Cross classification of Mediterranean diet and PUFAs intake

|                            | <b>Lung cancer risk</b> | <b>Lung cancer mortality</b> | <b>Lung cancer survival</b> |
|----------------------------|-------------------------|------------------------------|-----------------------------|
|                            | <b><i>P</i> value</b>   |                              |                             |
| <b>AMED_PUFA</b>           | 0.67                    | 0.84                         | 0.05                        |
| <b>Age</b>                 | 0.99                    | 0.64                         | 0.47                        |
| <b>Sex</b>                 | 0.77                    | 0.11                         | 0.50                        |
| <b>Ethnicity</b>           | 0.17                    | 0.39                         | 0.10                        |
| <b>Education</b>           | 0.58                    | 0.72                         | 0.20                        |
| <b>TDI</b>                 | 0.60                    | 0.83                         | 0.20                        |
| <b>Smoking</b>             | 0.11                    | 0.67                         | 0.14                        |
| <b>Physical activities</b> | 0.22                    | 0.46                         | 0.83                        |
| <b>BMI</b>                 | 0.32                    | 0.24                         | 0.21                        |
| <b>Family cancer</b>       | 0.49                    | 0.96                         | 0.42                        |
| <b>Energy</b>              | 0.27                    | 0.33                         | 0.42                        |
| <b>Histological type</b>   | -                       | -                            | 0.13                        |
| <b>Global</b>              | 0.56                    | 0.82                         | 0.09                        |

For the lung cancer survival analysis, age was defined as age at diagnosis, and additionally adjusted for histological type.

*P* value < 0.05 indicates a violation of the proportional hazards assumption.

**Supplemental Table 5.** Baseline characteristics of incident lung cancer cases according to quartiles of Alternate Mediterranean Diet (AMED) score.

| <b>Variable/Subgroups</b>                | <b>Overall</b><br>n = 1,520 | <b>Q1</b><br>n = 669 | <b>Q2</b><br>n = 307 | <b>Q3</b><br>n = 256 | <b>Q4</b><br>n = 288 | <b>P value</b> |
|------------------------------------------|-----------------------------|----------------------|----------------------|----------------------|----------------------|----------------|
| <b>Age at diagnosis, years</b>           | 68.47 (6.88)                | 67.95 (7.07)         | 68.48 (6.56)         | 69.03 (7.03)         | 69.15 (6.53)         | 0.038          |
| <b>Sex</b>                               |                             |                      |                      |                      |                      | 0.997          |
| Male                                     | 757 (49.80)                 | 333 (49.78)          | 152 (49.51)          | 127 (49.61)          | 145 (50.35)          |                |
| Female                                   | 763 (50.20)                 | 336 (50.22)          | 155 (50.49)          | 129 (50.39)          | 143 (49.65)          |                |
| <b>Ethnicity</b>                         |                             |                      |                      |                      |                      | 0.865          |
| White                                    | 1,466 (96.45)               | 650 (97.16)          | 294 (95.77)          | 245 (95.70)          | 277 (96.18)          |                |
| Non-White                                | 43 (2.83)                   | 16 (2.39)            | 10 (3.26)            | 9 (3.52)             | 8 (2.78)             |                |
| Unknown                                  | 11 (0.72)                   | 3 (0.45)             | 3 (0.98)             | 2 (0.78)             | 3 (1.04)             |                |
| <b>Townsend Deprivation Index</b>        | -0.87 (3.23)                | -0.68 (3.22)         | -1.01 (3.22)         | -1.27 (3.12)         | -0.81 (3.35)         | 0.071          |
| <b>Education level</b>                   |                             |                      |                      |                      |                      | <0.001         |
| Less than high school                    | 298 (19.61)                 | 151 (22.57)          | 58 (18.89)           | 41 (16.02)           | 48 (16.67)           |                |
| High school or equivalent                | 769 (50.59)                 | 362 (54.11)          | 150 (48.86)          | 120 (46.88)          | 137 (47.57)          |                |
| College or above                         | 440 (28.95)                 | 149 (22.27)          | 96 (31.27)           | 94 (36.72)           | 101 (35.07)          |                |
| Unknown                                  | 13 (0.86)                   | 7 (1.05)             | 3 (0.98)             | 1 (0.39)             | 2 (0.69)             |                |
| <b>Smoking status</b>                    |                             |                      |                      |                      |                      | 0.004          |
| Never smokers                            | 303 (19.93)                 | 109 (16.29)          | 55 (17.92)           | 70 (27.34)           | 69 (23.96)           |                |
| Ever smokers                             | 1,200 (78.95)               | 553 (82.66)          | 248 (80.78)          | 182 (71.09)          | 217 (75.35)          |                |
| Unknown                                  | 17 (1.12)                   | 7 (1.05)             | 4 (1.30)             | 4 (1.56)             | 2 (0.69)             |                |
| <b>Alcohol consumption</b>               |                             |                      |                      |                      |                      | 0.181          |
| Never or moderate                        | 864 (56.84)                 | 361 (53.96)          | 167 (54.40)          | 160 (62.50)          | 176 (61.11)          |                |
| Excessive                                | 491 (32.30)                 | 231 (34.53)          | 107 (34.85)          | 71 (27.73)           | 82 (28.47)           |                |
| Unknown                                  | 165 (10.86)                 | 77 (11.51)           | 33 (10.75)           | 25 (9.77)            | 30 (10.42)           |                |
| <b>Physical activity level</b>           |                             |                      |                      |                      |                      | 0.015          |
| Insufficiently active                    | 261 (17.17)                 | 137 (20.48)          | 44 (14.33)           | 39 (15.23)           | 41 (14.24)           |                |
| Sufficiently active                      | 928 (61.05)                 | 374 (55.90)          | 203 (66.12)          | 160 (62.50)          | 191 (66.32)          |                |
| Unknown                                  | 331 (21.78)                 | 158 (23.62)          | 60 (19.54)           | 57 (22.27)           | 56 (19.44)           |                |
| <b>Body mass index, kg/m<sup>2</sup></b> | 27.30 (4.84)                | 27.41 (5.22)         | 27.50 (4.86)         | 27.06 (4.36)         | 27.02 (4.29)         | 0.490          |
| <b>Histological type</b>                 |                             |                      |                      |                      |                      | 0.847          |
| Small cell lung cancer                   | 96 (6.32)                   | 45 (6.73)            | 20 (6.51)            | 16 (6.25)            | 15 (5.21)            |                |
| Non-small cell lung cancer               | 1424 (93.68)                | 624 (93.27)          | 287 (93.49)          | 240 (93.75)          | 273 (94.79)          |                |
| <b>Family history of lung cancer</b>     |                             |                      |                      |                      |                      | 0.827          |
| No                                       | 1,036 (68.16)               | 448 (66.97)          | 211 (68.73)          | 171 (66.80)          | 206 (71.53)          |                |
| Yes                                      | 286 (18.82)                 | 130 (19.43)          | 54 (17.59)           | 51 (19.92)           | 51 (17.71)           |                |
| Unknown                                  | 198 (13.03)                 | 91 (13.60)           | 42 (13.68)           | 34 (13.28)           | 31 (10.76)           |                |
| <b>Energy intake, kcal/day</b>           | 2,025.74 (553.43)           | 2,120.56 (532.12)    | 1,967.65 (542.80)    | 1,963.58 (557.58)    | 1,922.64 (577.05)    | <0.001         |

Data are presented as means (standard deviations) for continuous variables and numbers (percentages) for categorical variables.

**Supplemental Table 6.** Interaction analyses of Mediterranean diet adherence and polyunsaturated fatty acid intake.

|                              | <i>P</i> for interaction |
|------------------------------|--------------------------|
| <b>Lung cancer risk</b>      | 0.055                    |
| <b>Lung cancer mortality</b> | 0.710                    |
| <b>Lung cancer survival</b>  | 0.338                    |

**Supplemental Table 7.** Association of Mediterranean diet and PUFAs intake with lung cancer outcomes (including participants with moderate AMED adherence).

|                              | Low AMED score |                         | Moderate AMED score     |                         | High AMED score         |                         |
|------------------------------|----------------|-------------------------|-------------------------|-------------------------|-------------------------|-------------------------|
|                              | Low PUFAs      | High PUFAs              | Low PUFAs               | High PUFAs              | Low PUFAs               | High PUFAs              |
| <b>Whole population</b>      |                |                         |                         |                         |                         |                         |
| <b>Lung cancer risk</b>      |                |                         |                         |                         |                         |                         |
| Cases/Total                  | 459/42,324     | 210/26,072              | 287/37,731              | 276/40,062              | 105/15,515              | 183/29,435              |
| Model 1 (HR 95%CI)           | Reference      | <b>0.79 (0.67-0.93)</b> | <b>0.63 (0.54-0.73)</b> | <b>0.62 (0.54-0.72)</b> | <b>0.52 (0.42-0.64)</b> | <b>0.52 (0.44-0.62)</b> |
| Model 2 (HR 95%CI)           | Reference      | <b>0.80 (0.68-0.94)</b> | <b>0.70 (0.60-0.81)</b> | <b>0.68 (0.58-0.79)</b> | <b>0.61 (0.49-0.76)</b> | <b>0.62 (0.52-0.74)</b> |
| <b>Lung cancer mortality</b> |                |                         |                         |                         |                         |                         |
| Cases/Total                  | 266/42,324     | 113/26,072              | 156/37,731              | 156/40,062              | 51/15,515               | 93/29,435               |
| Model 1 (HR 95%CI)           | Reference      | <b>0.74 (0.60-0.93)</b> | <b>0.59 (0.48-0.72)</b> | <b>0.61 (0.50-0.75)</b> | <b>0.44 (0.32-0.59)</b> | <b>0.46 (0.36-0.58)</b> |
| Model 2 (HR 95%CI)           | Reference      | <b>0.75 (0.60-0.93)</b> | <b>0.67 (0.55-0.82)</b> | <b>0.68 (0.56-0.83)</b> | <b>0.54 (0.39-0.73)</b> | <b>0.57 (0.45-0.72)</b> |
| <b>Lung cancer survival</b>  |                |                         |                         |                         |                         |                         |
| Cases/Total                  | 287/422        | 155/247                 | 161/253                 | 192/310                 | 53/85                   | 111/203                 |
| Model 1 (HR 95%CI)           | Reference      | 0.86 (0.71-1.04)        | 0.96 (0.79-1.17)        | 0.94 (0.78-1.13)        | 0.92 (0.68-1.23)        | <b>0.73 (0.58-0.91)</b> |
| Model 2 (HR 95%CI)           | Reference      | 0.84 (0.69-1.02)        | 1.04 (0.85-1.27)        | 0.99 (0.82-1.19)        | 0.98 (0.73-1.33)        | <b>0.77 (0.62-0.96)</b> |
| <b>Ever-smokers</b>          |                |                         |                         |                         |                         |                         |
| <b>Lung cancer risk</b>      |                |                         |                         |                         |                         |                         |
| Cases/Total                  | 384/19,468     | 175/11,290              | 228/15,987              | 209/16,575              | 79/6,494                | 140/11,706              |
| Model 1 (HR 95%CI)           | Reference      | <b>0.83 (0.70-1.00)</b> | <b>0.64 (0.54-0.75)</b> | <b>0.62 (0.52-0.73)</b> | <b>0.51 (0.40-0.65)</b> | <b>0.55 (0.46-0.67)</b> |
| Model 2 (HR 95%CI)           | Reference      | <b>0.81 (0.68-0.97)</b> | <b>0.68 (0.58-0.81)</b> | <b>0.64 (0.54-0.76)</b> | <b>0.57 (0.45-0.73)</b> | <b>0.61 (0.50-0.74)</b> |
| <b>Lung cancer mortality</b> |                |                         |                         |                         |                         |                         |
| Cases/Total                  | 242/19,468     | 103/11,290              | 130/15,987              | 132/16,575              | 42/6,494                | 72/11,706               |
| Model 1 (HR 95%CI)           | Reference      | <b>0.78 (0.62-0.99)</b> | <b>0.58 (0.47-0.72)</b> | <b>0.63 (0.51-0.77)</b> | <b>0.43 (0.31-0.60)</b> | <b>0.45 (0.35-0.59)</b> |
| Model 2 (HR 95%CI)           | Reference      | <b>0.76 (0.61-0.96)</b> | <b>0.63 (0.51-0.78)</b> | <b>0.66 (0.53-0.81)</b> | <b>0.49 (0.35-0.69)</b> | <b>0.51 (0.39-0.66)</b> |
| <b>Lung cancer survival</b>  |                |                         |                         |                         |                         |                         |
| Cases/Total                  | 253/356        | 136/204                 | 130/199                 | 161/238                 | 45/64                   | 82/154                  |
| Model 1 (HR 95%CI)           | Reference      | 0.87 (0.70-1.07)        | 0.95 (0.77-1.18)        | 0.99 (0.81-1.20)        | 1.04 (0.75-1.43)        | <b>0.66 (0.52-0.85)</b> |
| Model 2 (HR 95%CI)           | Reference      | 0.84 (0.68-1.04)        | 1.00 (0.81-1.25)        | 1.02 (0.83-1.24)        | 1.03 (0.74-1.42)        | <b>0.69 (0.53-0.89)</b> |

Abbreviations: AMED, Alternate Mediterranean Diet; PUFA, polyunsaturated fatty acid; HR, hazard ratio; CI, confidence interval.

Model 1 (minimally adjusted) was adjusted for age, sex, and total energy intake; model 2 (fully adjusted) was additionally adjusted for ethnicity, Townsend Deprivation Index, education level, smoking status, physical activity level, body mass index, and family history of lung cancer.

For the lung cancer survival analysis, age was defined as age at diagnosis, and model 2 was additionally adjusted for histological type.

Data with *P* values below 0.05 are shown in bold type.

**Supplemental Table 8.** Association between Mediterranean diet and lung cancer outcomes (restricting the dataset to participants who provided at least two 24-hour dietary recalls).

|                              | AMED score |                         |                         |                         | <i>P</i> trend |
|------------------------------|------------|-------------------------|-------------------------|-------------------------|----------------|
|                              | Q1 (0-3)   | Q2 (4)                  | Q3 (5)                  | Q4 (6-9)                |                |
| <b>Lung cancer risk</b>      |            |                         |                         |                         |                |
| Cases/Total                  | 331/33,919 | 165/23,893              | 157/23,575              | 203/33,007              |                |
| Model 1 (HR 95%CI)           | Reference  | <b>0.66 (0.55,0.80)</b> | <b>0.60 (0.51,0.70)</b> | <b>0.51 (0.41,0.65)</b> | < <b>0.001</b> |
| Model 2 (HR 95%CI)           | Reference  | <b>0.71 (0.59,0.86)</b> | <b>0.67 (0.57,0.79)</b> | <b>0.60 (0.48,0.77)</b> | < <b>0.001</b> |
| <b>Lung cancer mortality</b> |            |                         |                         |                         |                |
| Cases/Total                  | 184/33,919 | 90/23,893               | 84/23,575               | 95/33,007               |                |
| Model 1 (HR 95%CI)           | Reference  | <b>0.65 (0.50,0.83)</b> | <b>0.57 (0.45,0.70)</b> | <b>0.35 (0.24,0.51)</b> | < <b>0.001</b> |
| Model 2 (HR 95%CI)           | Reference  | <b>0.70 (0.54,0.90)</b> | <b>0.65 (0.52,0.81)</b> | <b>0.43 (0.30,0.62)</b> | < <b>0.001</b> |
| <b>Lung cancer survival</b>  |            |                         |                         |                         |                |
| Cases/Total                  | 218/331    | 101/165                 | 92/157                  | 110/203                 |                |
| Model 1 (HR 95%CI)           | Reference  | 0.96 (0.75,1.21)        | 0.95 (0.74,1.21)        | <b>0.76 (0.60,0.96)</b> | <b>0.041</b>   |
| Model 2 (HR 95%CI)           | Reference  | 0.98 (0.77,1.25)        | 1.04 (0.81,1.34)        | 0.82 (0.65,1.04)        | 0.222          |

Abbreviations: AMED, Alternate Mediterranean Diet; HR, hazard ratio; CI, confidence interval.

Model 1 (minimally adjusted) was adjusted for age, sex, and total energy intake; model 2 (fully adjusted) was additionally adjusted for ethnicity, Townsend Deprivation Index, education level, smoking status, physical activity level, body mass index, and family history of lung cancer.

For the lung cancer survival analysis, age was defined as age at diagnosis, and model 2 was additionally adjusted for histological type.

Data with *P* values below 0.05 are shown in bold type.

**Supplemental Table 9.** Associations between isocaloric substitution of saturated fatty acids with unsaturated fatty acids and lung cancer outcomes (restricting the dataset to participants who provided at least two 24-hour dietary recalls).

|                              | HR 95%CI                  |                           | <i>P</i> value |
|------------------------------|---------------------------|---------------------------|----------------|
|                              | Substitution of 1% energy | Substitution of 5% energy |                |
| <b>Lung cancer risk</b>      |                           |                           |                |
| PUFAs for SFAs               | <b>0.89 (0.84,0.95)</b>   | <b>0.56 (0.41,0.78)</b>   | < <b>0.001</b> |
| MUFAs for SFAs               | 0.97 (0.89,1.05)          | 0.85 (0.57,1.28)          | 0.444          |
| <b>Lung cancer mortality</b> |                           |                           |                |
| PUFAs for SFAs               | <b>0.89 (0.81,0.97)</b>   | <b>0.54 (0.35,0.85)</b>   | <b>0.008</b>   |
| MUFAs for SFAs               | 1.00 (0.89,1.12)          | 0.99 (0.56,1.73)          | 0.965          |
| <b>Lung cancer survival</b>  |                           |                           |                |
| PUFAs for SFAs               | 0.94 (0.87,1.02)          | 0.74 (0.49,1.11)          | 0.146          |
| MUFAs for SFAs               | 1.01 (0.91,1.12)          | 1.05 (0.63,1.75)          | 0.855          |

Abbreviations: AMED, Alternate Mediterranean Diet; MUFA, monounsaturated fatty acid; PUFA, polyunsaturated fatty acid; SFA, saturated fatty acid; HR, hazard ratio; CI, confidence interval.

Models were adjusted for age, sex, total energy intake, ethnicity, Townsend Deprivation Index, education level, smoking status, alcohol consumption, physical activity level, body mass index, and family history of lung cancer.

For the lung cancer survival analysis, age was defined as age at diagnosis, and the models were additionally adjusted for histological type.

Data with *P* values below 0.05 are shown in bold type.

**Supplemental Table 10.** Association of Mediterranean diet and PUFAs intake with lung cancer outcomes (restricting the dataset to participants who provided at least two 24-hour dietary recalls).

|                              | Low AMED score<br>and low PUFAs | Low AMED score<br>and high PUFAs | High AMED score<br>and low PUFAs | High AMED score<br>and high PUFAs |
|------------------------------|---------------------------------|----------------------------------|----------------------------------|-----------------------------------|
| <b>Lung cancer risk</b>      |                                 |                                  |                                  |                                   |
| Cases/Total                  | 224/21,484                      | 107/12,435                       | 73/11,695                        | 130/21,312                        |
| Model 1 (HR 95%CI)           | Reference                       | 0.88 (0.70,1.10)                 | <b>0.52 (0.40,0.67)</b>          | <b>0.53 (0.43,0.66)</b>           |
| Model 2 (HR 95%CI)           | Reference                       | 0.90 (0.71,1.13)                 | <b>0.61 (0.47,0.80)</b>          | <b>0.63 (0.51,0.79)</b>           |
| <b>Lung cancer mortality</b> |                                 |                                  |                                  |                                   |
| Cases/Total                  | 125/21,484                      | 59/12,435                        | 32/11,695                        | 63/21,312                         |
| Model 1 (HR 95%CI)           | Reference                       | 0.87 (0.64,1.19)                 | <b>0.42 (0.28,0.61)</b>          | <b>0.45 (0.33,0.62)</b>           |
| Model 2 (HR 95%CI)           | Reference                       | 0.89 (0.65,1.22)                 | <b>0.51 (0.35,0.76)</b>          | <b>0.57 (0.41,0.77)</b>           |
| <b>Lung cancer survival</b>  |                                 |                                  |                                  |                                   |
| Cases/Total                  | 142/210                         | 76/121                           | 35/61                            | 75/142                            |
| Model 1 (HR 95%CI)           | Reference                       | 0.83 (0.63,1.10)                 | 0.82 (0.56,1.20)                 | <b>0.67 (0.51,0.89)</b>           |
| Model 2 (HR 95%CI)           | Reference                       | 0.76 (0.57,1.02)                 | 0.91 (0.62,1.33)                 | <b>0.70 (0.52,0.93)</b>           |

Abbreviations: AMED, Alternate Mediterranean Diet; PUFA, polyunsaturated fatty acid; HR, hazard ratio; CI, confidence interval.

Model 1 (minimally adjusted) was adjusted for age, sex, and total energy intake; model 2 (fully adjusted) was additionally adjusted for ethnicity, Townsend Deprivation Index, education level, smoking status, physical activity level, body mass index, and family history of lung cancer.

For the lung cancer survival analysis, age was defined as age at diagnosis, and model 2 was additionally adjusted for histological type.

Data with *P* values below 0.05 are shown in bold type.

**Supplemental Table 11.** Association between Mediterranean diet and lung cancer outcomes (excluding participants with missing covariate data).

|                              | AMED score |                         |                         |                          | <i>P</i> trend |
|------------------------------|------------|-------------------------|-------------------------|--------------------------|----------------|
|                              | Q1 (0-3)   | Q2 (4)                  | Q3 (5)                  | Q4 (6-9)                 |                |
| <b>Lung cancer risk</b>      |            |                         |                         |                          |                |
| Cases/Total                  | 393/42,263 | 186/26,076              | 157/23,753              | 184/30,050               |                |
| Model 1 (HR 95%CI)           | Reference  | <b>0.71 (0.60,0.85)</b> | <b>0.64 (0.53,0.77)</b> | <b>0.56 (0.47,0.67)</b>  | < 0.001        |
| Model 2 (HR 95%CI)           | Reference  | <b>0.76 (0.64,0.91)</b> | <b>0.71 (0.59,0.85)</b> | <b>0.65 (0.55,0.78)</b>  | < 0.001        |
| <b>Lung cancer mortality</b> |            |                         |                         |                          |                |
| Cases/Total                  | 225/42,263 | 102/26,076              | 79/23,753               | 98/30,050                |                |
| Model 1 (HR 95%CI)           | Reference  | <b>0.68 (0.54,0.86)</b> | <b>0.56 (0.43,0.73)</b> | <b>0.52 (0.41,0.66)</b>  | < 0.001        |
| Model 2 (HR 95%CI)           | Reference  | <b>0.75 (0.59,0.95)</b> | <b>0.64 (0.50,0.83)</b> | <b>0.64 (0.50, 0.81)</b> | < 0.001        |
| <b>Lung cancer survival</b>  |            |                         |                         |                          |                |
| Cases/Total                  | 262/393    | 121/186                 | 88/157                  | 113/184                  |                |
| Model 1 (HR 95%CI)           | Reference  | 1.05 (0.85,1.31)        | 0.80 (0.63,1.03)        | 0.91 (0.73,1.14)         | 0.196          |
| Model 2 (HR 95%CI)           | Reference  | 1.12 (0.90,1.40)        | 0.90 (0.70,1.16)        | 0.98 (0.78,1.23)         | 0.743          |

Abbreviations: AMED, Alternate Mediterranean Diet; HR, hazard ratio; CI, confidence interval.

Model 1 (minimally adjusted) was adjusted for age, sex, and total energy intake; model 2 (fully adjusted) was additionally adjusted for ethnicity, Townsend Deprivation Index, education level, smoking status, physical activity level, body mass index, and family history of lung cancer.

For the lung cancer survival analysis, age was defined as age at diagnosis, and model 2 was additionally adjusted for histological type.

Data with *P* values below 0.05 are shown in bold type.

**Supplemental Table 12.** Associations between isocaloric substitution of saturated fatty acids with unsaturated fatty acids and lung cancer outcomes (excluding participants with missing covariate data).

|                              | HR 95%CI                  |                           | P value        |
|------------------------------|---------------------------|---------------------------|----------------|
|                              | Substitution of 1% energy | Substitution of 5% energy |                |
| <b>Lung cancer risk</b>      |                           |                           |                |
| PUFAs for SFAs               | <b>0.89 (0.85,0.94)</b>   | <b>0.57 (0.43,0.75)</b>   | < <b>0.001</b> |
| MUFAs for SFAs               | 1.02 (0.95,1.09)          | 1.09 (0.79,1.51)          | 0.594          |
| <b>Lung cancer mortality</b> |                           |                           |                |
| PUFAs for SFAs               | <b>0.90 (0.83,0.96)</b>   | <b>0.58 (0.40,0.83)</b>   | <b>0.003</b>   |
| MUFAs for SFAs               | 0.98 (0.90,1.07)          | 0.91 (0.58,1.42)          | 0.687          |
| <b>Lung cancer survival</b>  |                           |                           |                |
| PUFAs for SFAs               | 1.02 (0.95,1.09)          | 1.09 (0.78,1.53)          | 0.595          |
| MUFAs for SFAs               | 0.97 (0.90,1.05)          | 0.87 (0.59,1.29)          | 0.491          |

Abbreviations: AMED, Alternate Mediterranean Diet; MUFA, monounsaturated fatty acid; PUFA, polyunsaturated fatty acid; SFA, saturated fatty acid; HR, hazard ratio; CI, confidence interval.

Models were adjusted for age, sex, total energy intake, ethnicity, Townsend Deprivation Index, education level, smoking status, alcohol consumption, physical activity level, body mass index, and family history of lung cancer.

For the lung cancer survival analysis, age was defined as age at diagnosis, and the models were additionally adjusted for histological type.

Data with *P* values below 0.05 are shown in bold type.

**Supplemental Table 13.** Association of Mediterranean diet and PUFAs intake with lung cancer outcomes (excluding participants with missing covariate data).

|                              | Low AMED score<br>and low PUFAs | Low AMED score<br>and high PUFAs | High AMED score<br>and low PUFAs | High AMED score<br>and high PUFAs |
|------------------------------|---------------------------------|----------------------------------|----------------------------------|-----------------------------------|
| <b>Lung cancer risk</b>      |                                 |                                  |                                  |                                   |
| Cases/Total                  | 275/26,382                      | 118/15,881                       | 72/10,416                        | 112/19,634                        |
| Model 1 (HR 95%CI)           | Reference                       | <b>0.76 (0.61,0.94)</b>          | <b>0.56 (0.43,0.73)</b>          | <b>0.50 (0.40,0.62)</b>           |
| Model 2 (HR 95%CI)           | Reference                       | <b>0.77 (0.62,0.96)</b>          | <b>0.67 (0.52,0.88)</b>          | <b>0.60 (0.48,0.75)</b>           |
| <b>Lung cancer mortality</b> |                                 |                                  |                                  |                                   |
| Cases/Total                  | 162/26,382                      | 63/15,881                        | 39/10,416                        | 59/19,634                         |
| Model 1 (HR 95%CI)           | Reference                       | <b>0.69 (0.51,0.92)</b>          | <b>0.52 (0.37,0.75)</b>          | <b>0.45 (0.33,0.60)</b>           |
| Model 2 (HR 95%CI)           | Reference                       | <b>0.71 (0.53,0.94)</b>          | <b>0.65 (0.45,0.93)</b>          | <b>0.56 (0.41,0.76)</b>           |
| <b>Lung cancer survival</b>  |                                 |                                  |                                  |                                   |
| Cases/Total                  | 175/249                         | 87/144                           | 40/57                            | 73/127                            |
| Model 1 (HR 95%CI)           | Reference                       | <b>0.76 (0.58,0.98)</b>          | 1.05 (0.73,1.49)                 | <b>0.75 (0.57,0.99)</b>           |
| Model 2 (HR 95%CI)           | Reference                       | 0.79 (0.61,1.03)                 | 1.09 (0.76,1.57)                 | 0.81 (0.61,1.07)                  |

Abbreviations: AMED, Alternate Mediterranean Diet; PUFA, polyunsaturated fatty acid; HR, hazard ratio; CI, confidence interval.

Model 1 (minimally adjusted) was adjusted for age, sex, and total energy intake; model 2 (fully adjusted) was additionally adjusted for ethnicity, Townsend Deprivation Index, education level, smoking status, physical activity level, body mass index, and family history of lung cancer.

For the lung cancer survival analysis, age was defined as age at diagnosis, and model 2 was additionally adjusted for histological type.

Data with *P* values below 0.05 are shown in bold type.

**Supplemental Table 14.** Association between Mediterranean diet and lung cancer outcomes (excluding participants with less than one year of follow-up).

|                              | AMED score |                         |                         |                         | <i>P</i> trend |
|------------------------------|------------|-------------------------|-------------------------|-------------------------|----------------|
|                              | Q1 (0-3)   | Q2 (4)                  | Q3 (5)                  | Q4 (6-9)                |                |
| <b>Lung cancer risk</b>      |            |                         |                         |                         |                |
| Cases/Total                  | 645/68,349 | 303/40,956              | 250/36,801              | 281/44,938              |                |
| Model 1 (HR 95%CI)           | Reference  | <b>0.73 (0.64,0.84)</b> | <b>0.65 (0.56,0.75)</b> | <b>0.57 (0.49,0.66)</b> | < 0.001        |
| Model 2 (HR 95%CI)           | Reference  | <b>0.79 (0.68,0.90)</b> | <b>0.73 (0.63,0.84)</b> | <b>0.67 (0.58,0.78)</b> | < 0.001        |
| <b>Lung cancer mortality</b> |            |                         |                         |                         |                |
| Cases/Total                  | 364/68,349 | 165/40,956              | 142/36,801              | 140/44,938              |                |
| Model 1 (HR 95%CI)           | Reference  | <b>0.71 (0.59,0.85)</b> | <b>0.65 (0.54,0.79)</b> | <b>0.50 (0.41,0.61)</b> | < 0.001        |
| Model 2 (HR 95%CI)           | Reference  | <b>0.78 (0.65,0.93)</b> | <b>0.76 (0.62,0.92)</b> | <b>0.62 (0.51,0.76)</b> | < 0.001        |
| <b>Lung cancer survival</b>  |            |                         |                         |                         |                |
| Cases/Total                  | 424/645    | 191/303                 | 155/250                 | 158/281                 |                |
| Model 1 (HR 95%CI)           | Reference  | 1.01 (0.85,1.20)        | 0.99 (0.82,1.19)        | <b>0.82 (0.68,0.99)</b> | 0.102          |
| Model 2 (HR 95%CI)           | Reference  | 1.07 (0.90,1.27)        | 1.09 (0.90,1.31)        | 0.89 (0.74,1.07)        | 0.600          |

Abbreviations: AMED, Alternate Mediterranean Diet; HR, hazard ratio; CI, confidence interval.

Model 1 (minimally adjusted) was adjusted for age, sex, and total energy intake; model 2 (fully adjusted) was additionally adjusted for ethnicity, Townsend Deprivation Index, education level, smoking status, physical activity level, body mass index, and family history of lung cancer.

For the lung cancer survival analysis, age was defined as age at diagnosis, and model 2 was additionally adjusted for histological type.

Data with *P* values below 0.05 are shown in bold type.

**Supplemental Table 15.** Associations between isocaloric substitution of saturated fatty acids with unsaturated fatty acids and lung cancer outcomes (excluding participants with less than one year of follow-up).

|                              | HR 95%CI                  |                           | <i>P</i> value |
|------------------------------|---------------------------|---------------------------|----------------|
|                              | Substitution of 1% energy | Substitution of 5% energy |                |
| <b>Lung cancer risk</b>      |                           |                           |                |
| PUFAs for SFAs               | <b>0.90 (0.87,0.94)</b>   | <b>0.61 (0.49,0.75)</b>   | < 0.001        |
| MUFAs for SFAs               | 1.01 (0.96,1.06)          | 1.03 (0.80,1.32)          | 0.843          |
| <b>Lung cancer mortality</b> |                           |                           |                |
| PUFAs for SFAs               | <b>0.91 (0.86,0.96)</b>   | <b>0.61 (0.46,0.81)</b>   | < 0.001        |
| MUFAs for SFAs               | 1.01 (0.94,1.08)          | 1.04 (0.74,1.48)          | 0.806          |
| <b>Lung cancer survival</b>  |                           |                           |                |
| PUFAs for SFAs               | 1.00 (0.95,1.05)          | 0.99 (0.76,1.29)          | 0.955          |
| MUFAs for SFAs               | 1.00 (0.94,1.06)          | 1.00 (0.74,1.36)          | 0.986          |

Abbreviations: AMED, Alternate Mediterranean Diet; MUFA, monounsaturated fatty acid; PUFA, polyunsaturated fatty acid; SFA, saturated fatty acid; HR, hazard ratio; CI, confidence interval.

Models were adjusted for age, sex, total energy intake, ethnicity, Townsend Deprivation Index, education level, smoking status, alcohol consumption, physical activity level, body mass index, and family history of lung cancer.

For the lung cancer survival analysis, age was defined as age at diagnosis, and the models were additionally adjusted for histological type.

Data with *P* values below 0.05 are shown in bold type.

**Supplemental Table 16.** Association of Mediterranean diet and PUFAs intake with lung cancer outcomes (excluding participants with less than one year of follow-up).

|                              | Low AMED score<br>and low PUFAs | Low AMED score<br>and high PUFAs | High AMED score<br>and low PUFAs | High AMED score<br>and high PUFAs |
|------------------------------|---------------------------------|----------------------------------|----------------------------------|-----------------------------------|
| <b>Lung cancer risk</b>      |                                 |                                  |                                  |                                   |
| Cases/Total                  | 440/42,293                      | 205/26,056                       | 100/15,513                       | 181/29,425                        |
| Model 1 (HR 95%CI)           | Reference                       | <b>0.82 (0.69,0.96)</b>          | <b>0.52 (0.41,0.65)</b>          | <b>0.54 (0.46,0.65)</b>           |
| Model 2 (HR 95%CI)           | Reference                       | <b>0.82 (0.70,0.97)</b>          | <b>0.62 (0.50,0.78)</b>          | <b>0.66 (0.55,0.79)</b>           |
| <b>Lung cancer mortality</b> |                                 |                                  |                                  |                                   |
| Cases/Total                  | 254/42,293                      | 110/26,056                       | 48/15,513                        | 92/29,425                         |
| Model 1 (HR 95%CI)           | Reference                       | <b>0.78 (0.62,0.97)</b>          | <b>0.45 (0.33,0.61)</b>          | <b>0.48 (0.38,0.61)</b>           |
| Model 2 (HR 95%CI)           | Reference                       | <b>0.78 (0.63,0.98)</b>          | <b>0.56 (0.41,0.77)</b>          | <b>0.61 (0.48,0.78)</b>           |
| <b>Lung cancer survival</b>  |                                 |                                  |                                  |                                   |
| Cases/Total                  | 275/407                         | 149/238                          | 49/82                            | 109/199                           |
| Model 1 (HR 95%CI)           | Reference                       | <b>0.81 (0.67,0.99)</b>          | 0.91 (0.66,1.24)                 | <b>0.71 (0.57,0.89)</b>           |
| Model 2 (HR 95%CI)           | Reference                       | <b>0.81 (0.66,0.98)</b>          | 0.98 (0.71,1.34)                 | <b>0.76 (0.61,0.96)</b>           |

Abbreviations: AMED, Alternate Mediterranean Diet; PUFA, polyunsaturated fatty acid; HR, hazard ratio; CI, confidence interval.

Model 1 (minimally adjusted) was adjusted for age, sex, and total energy intake; model 2 (fully adjusted) was additionally adjusted for ethnicity, Townsend Deprivation Index, education level, smoking status, physical activity level, body mass index, and family history of lung cancer.

For the lung cancer survival analysis, age was defined as age at diagnosis, and model 2 was additionally adjusted for histological type.

Data with *P* values below 0.05 are shown in bold type.

**Supplemental Table 17.** Baseline characteristics of the analytic cohort compared with excluded participants.

| Variable/Subgroups                | Analytic cohort<br>n = 191,139 | Excluded participants<br>n = 311,217 | SMD          |
|-----------------------------------|--------------------------------|--------------------------------------|--------------|
| <b>Age, years</b>                 | 55.82 (7.95)                   | 56.97 (8.15)                         | <b>0.143</b> |
| <b>Sex</b>                        |                                |                                      | 0.006        |
| Male                              | 87,536 (45.80)                 | 141,526 (45.5)                       |              |
| Female                            | 103,603 (54.20)                | 169,691 (54.5)                       |              |
| <b>Ethnicity</b>                  |                                |                                      | 0.081        |
| White                             | 182,251 (95.7)                 | 290,310 (93.9)                       |              |
| Non-White                         | 8,188 (4.3)                    | 18,829 (6.1)                         |              |
| <b>Townsend Deprivation Index</b> | -1.58 (2.87)                   | -1.12 (3.21)                         | <b>0.150</b> |
| <b>Education level</b>            |                                |                                      | <b>0.479</b> |
| Less than high school             | 15,925 (8.4)                   | 69,329 (23.0)                        |              |
| High school or equivalent         | 92,534 (48.6)                  | 153,337 (50.8)                       |              |
| College or above                  | 81,755 (43.0)                  | 79,344 (26.3)                        |              |
| <b>Smoking status</b>             |                                |                                      | 0.069        |
| Never smokers                     | 108,058 (57.3)                 | 164,020 (53.9)                       |              |
| Ever smokers                      | 80,434 (42.7)                  | 140,163 (46.1)                       |              |
| <b>Alcohol consumption</b>        |                                |                                      | 0.038        |
| Never or moderate                 | 120,249 (70.3)                 | 170,978 (68.6)                       |              |
| Excessive                         | 50,807 (29.7)                  | 78,374 (31.4)                        |              |
| <b>Physical activity level</b>    |                                |                                      | 0.019        |

|                                          |                |                |              |
|------------------------------------------|----------------|----------------|--------------|
| Insufficiently active                    | 28,434 (18.0)  | 42,541 (18.7)  |              |
| Sufficiently active                      | 129,513 (82.0) | 184,689 (81.3) |              |
| <b>Body mass index, kg/m<sup>2</sup></b> | 26.95 (4.64)   | 27.73 (4.88)   | <b>0.165</b> |
| <b>Family history of lung cancer</b>     |                |                | 0.059        |
| No                                       | 144,544 (86.7) | 229,041 (84.6) |              |
| Yes                                      | 22,252 (13.3)  | 41,668 (15.4)  |              |

Data are presented as means (standard deviations) for continuous variables and numbers (percentages) for categorical variables. SMD > 0.1 was considered indicative of a meaningful imbalance.

Abbreviations: SMD, standardized mean difference.

**Supplemental Table 18.** Association between Mediterranean diet and lung cancer outcomes (inverse probability weighting-adjusted for selection bias between included and excluded participants).

|                              | AMED score |                          |                          |                          | <i>P</i> trend |
|------------------------------|------------|--------------------------|--------------------------|--------------------------|----------------|
|                              | Q1 (0-3)   | Q2 (4)                   | Q3 (5)                   | Q4 (6-9)                 |                |
| <b>Lung cancer risk</b>      |            |                          |                          |                          |                |
| Model 1 (HR 95%CI)           | Reference  | <b>0.70 (0.60, 0.80)</b> | <b>0.61 (0.53, 0.71)</b> | <b>0.57 (0.49, 0.66)</b> | < <b>0.001</b> |
| Model 2 (HR 95%CI)           | Reference  | <b>0.76 (0.65, 0.87)</b> | <b>0.70 (0.60, 0.82)</b> | <b>0.69 (0.60, 0.81)</b> | < <b>0.001</b> |
| <b>Lung cancer mortality</b> |            |                          |                          |                          |                |
| Model 1 (HR 95%CI)           | Reference  | <b>0.67 (0.56, 0.82)</b> | <b>0.62 (0.51, 0.77)</b> | <b>0.52 (0.43, 0.64)</b> | < <b>0.001</b> |
| Model 2 (HR 95%CI)           | Reference  | <b>0.75 (0.62, 0.91)</b> | <b>0.73 (0.60, 0.90)</b> | <b>0.66 (0.53, 0.82)</b> | < <b>0.001</b> |
| <b>Lung cancer survival</b>  |            |                          |                          |                          |                |
| Model 1 (HR 95%CI)           | Reference  | 1.06 (0.88, 1.27)        | 1.04 (0.87, 1.25)        | 0.90 (0.75, 1.09)        | <b>0.557</b>   |
| Model 2 (HR 95%CI)           | Reference  | 1.12 (0.93, 1.35)        | 1.14 (0.95, 1.37)        | 0.96 (0.79, 1.16)        | 0.963          |

Abbreviations: AMED, Alternate Mediterranean Diet; HR, hazard ratio; CI, confidence interval.

Model 1 (minimally adjusted) was adjusted for age, sex, and total energy intake; model 2 (fully adjusted) was additionally adjusted for ethnicity, Townsend Deprivation Index, education level, smoking status, physical activity level, body mass index, and family history of lung cancer.

For the lung cancer survival analysis, age was defined as age at diagnosis, and model 2 was additionally adjusted for histological type.

Data with *P* values below 0.05 are shown in bold type.

**Supplemental Table 19.** Associations between isocaloric substitution of saturated fatty acids with unsaturated fatty acids and lung cancer outcomes (inverse probability weighting-adjusted for selection bias between included and excluded participants).

|                              | HR 95%CI                  |                           | <i>P</i> value |
|------------------------------|---------------------------|---------------------------|----------------|
|                              | Substitution of 1% energy | Substitution of 5% energy |                |
| <b>Lung cancer risk</b>      |                           |                           |                |
| PUFAs for SFAs               | <b>0.90 (0.86, 0.94)</b>  | <b>0.59 (0.46, 0.73)</b>  | < <b>0.001</b> |
| MUFAs for SFAs               | 1.00 (0.94, 1.05)         | 0.98 (0.74, 1.30)         | 0.874          |
| <b>Lung cancer mortality</b> |                           |                           |                |
| PUFAs for SFAs               | <b>0.90 (0.85, 0.96)</b>  | <b>0.59 (0.44, 0.81)</b>  | <b>0.001</b>   |
| MUFAs for SFAs               | 0.98 (0.91, 1.06)         | 0.90 (0.62, 1.31)         | 0.596          |
| <b>Lung cancer survival</b>  |                           |                           |                |
| PUFAs for SFAs               | 1.01 (0.95, 1.06)         | 1.04 (0.79, 1.36)         | 0.794          |
| MUFAs for SFAs               | 0.98 (0.93, 1.04)         | 0.92 (0.69, 1.24)         | 0.604          |

Abbreviations: AMED, Alternate Mediterranean Diet; MUFA, monounsaturated fatty acid; PUFA, polyunsaturated fatty acid; SFA, saturated fatty acid; HR, hazard ratio; CI, confidence interval.

Models were adjusted for age, sex, total energy intake, ethnicity, Townsend Deprivation Index, education level, smoking status, alcohol consumption, physical activity level, body mass index, and family history of lung cancer.

For the lung cancer survival analysis, age was defined as age at diagnosis, and the models were additionally adjusted for histological type.

Data with *P* values below 0.05 are shown in bold type.

**Supplemental Table 20.** Association of Mediterranean diet and PUFAs intake with lung cancer outcomes (inverse probability weighting-adjusted for selection bias between included and excluded participants).

|                              | Low AMED score<br>and low PUFAs | Low AMED score<br>and high PUFAs | High AMED score<br>and low PUFAs | High AMED score<br>and high PUFAs |
|------------------------------|---------------------------------|----------------------------------|----------------------------------|-----------------------------------|
| <b>Lung cancer risk</b>      |                                 |                                  |                                  |                                   |
| Model 1 (HR 95%CI)           | Reference                       | 0.84 (0.71, 1.00)                | <b>0.56 (0.44, 0.70)</b>         | <b>0.53 (0.45, 0.64)</b>          |
| Model 2 (HR 95%CI)           | Reference                       | <b>0.84 (0.71, 1.00)</b>         | <b>0.69 (0.54, 0.87)</b>         | <b>0.67 (0.55, 0.80)</b>          |
| <b>Lung cancer mortality</b> |                                 |                                  |                                  |                                   |
| Model 1 (HR 95%CI)           | Reference                       | <b>0.77 (0.61, 0.97)</b>         | <b>0.48 (0.35, 0.67)</b>         | <b>0.48 (0.37, 0.62)</b>          |
| Model 2 (HR 95%CI)           | Reference                       | <b>0.77 (0.61, 0.97)</b>         | <b>0.62 (0.45, 0.87)</b>         | <b>0.63 (0.48, 0.81)</b>          |
| <b>Lung cancer survival</b>  |                                 |                                  |                                  |                                   |
| Model 1 (HR 95%CI)           | Reference                       | 0.84 (0.69, 1.03)                | 0.97 (0.72, 1.32)                | 0.80 (0.63, 1.01)                 |
| Model 2 (HR 95%CI)           | Reference                       | 0.82 (0.64, 1.03)                | 0.97 (0.71, 1.33)                | <b>0.81 (0.67, 0.99)</b>          |

Abbreviations: AMED, Alternate Mediterranean Diet; PUFA, polyunsaturated fatty acid; HR, hazard ratio; CI, confidence interval.

Model 1 (minimally adjusted) was adjusted for age, sex, and total energy intake; model 2 (fully adjusted) was additionally adjusted for ethnicity, Townsend Deprivation Index, education level, smoking status, physical activity level, body mass index, and family history of lung cancer.

For the lung cancer survival analysis, age was defined as age at diagnosis, and model 2 was additionally adjusted for histological type.

Data with *P* values below 0.05 are shown in bold type.

**Supplemental Table 21.** Association between Mediterranean diet and lung cancer outcomes (competing risk analyses utilizing the Fine-Gray subdistribution hazard model).

|                              | AMED score |                          |                          |                          | <i>P</i> trend |
|------------------------------|------------|--------------------------|--------------------------|--------------------------|----------------|
|                              | Q1 (0-3)   | Q2 (4)                   | Q3 (5)                   | Q4 (6-9)                 |                |
| <b>Lung cancer risk</b>      |            |                          |                          |                          |                |
| Cases/Total                  | 331/33,919 | 165/23,893               | 157/23,575               | 203/33,007               |                |
| Model 1 (HR 95%CI)           | Reference  | <b>0.71 (0.62, 0.82)</b> | <b>0.64 (0.55, 0.74)</b> | <b>0.57 (0.49, 0.65)</b> | < <b>0.001</b> |
| Model 2 (HR 95%CI)           | Reference  | <b>0.77 (0.67, 0.88)</b> | <b>0.72 (0.62, 0.83)</b> | <b>0.67 (0.58, 0.78)</b> | < <b>0.001</b> |
| <b>Lung cancer mortality</b> |            |                          |                          |                          |                |
| Cases/Total                  | 184/33,919 | 90/23,893                | 84/23,575                | 95/33,007                |                |
| Model 1 (HR 95%CI)           | Reference  | <b>0.69 (0.58, 0.83)</b> | <b>0.64 (0.53, 0.78)</b> | <b>0.50 (0.41, 0.61)</b> | < <b>0.001</b> |
| Model 2 (HR 95%CI)           | Reference  | <b>0.77 (0.64, 0.92)</b> | <b>0.74 (0.61, 0.90)</b> | <b>0.62 (0.51, 0.76)</b> | < <b>0.001</b> |

Abbreviations: AMED, Alternate Mediterranean Diet; HR, hazard ratio; CI, confidence interval.

Model 1 (minimally adjusted) was adjusted for age, sex, and total energy intake; model 2 (fully adjusted) was additionally adjusted for ethnicity, Townsend Deprivation Index, education level, smoking status, physical activity level, body mass index, and family history of lung cancer.

Data with *P* values below 0.05 are shown in bold type.

**Supplemental Table 22.** Associations between isocaloric substitution of saturated fatty acids with unsaturated fatty acids and lung cancer outcomes (competing risk analyses utilizing the Fine-Gray subdistribution hazard model).

|                              | HR 95%CI                  |                           | P value           |
|------------------------------|---------------------------|---------------------------|-------------------|
|                              | Substitution of 1% energy | Substitution of 5% energy |                   |
| <b>Lung cancer risk</b>      |                           |                           |                   |
| PUFAs for SFAs               | <b>0.91 (0.87, 0.95)</b>  | <b>0.62 (0.50, 0.77)</b>  | <b>&lt; 0.001</b> |
| MUFAs for SFAs               | 1.00 (0.95, 1.06)         | 1.00 (0.77, 1.34)         | 0.990             |
| <b>Lung cancer mortality</b> |                           |                           |                   |
| PUFAs for SFAs               | <b>0.91 (0.85, 0.96)</b>  | <b>0.62 (0.44, 0.82)</b>  | <b>0.002</b>      |
| MUFAs for SFAs               | 1.00 (0.93, 1.07)         | 1.00 (0.70, 1.40)         | 0.960             |

Abbreviations: AMED, Alternate Mediterranean Diet; MUFA, monounsaturated fatty acid; PUFA, polyunsaturated fatty acid; SFA, saturated fatty acid; HR, hazard ratio; CI, confidence interval.

Models were adjusted for age, sex, total energy intake, ethnicity, Townsend Deprivation Index, education level, smoking status, alcohol consumption, physical activity level, body mass index, and family history of lung cancer.

Data with *P* values below 0.05 are shown in bold type.

**Supplemental Table 23.** Association of Mediterranean diet and PUFAs intake with lung cancer outcomes (competing risk analyses utilizing the Fine-Gray subdistribution hazard model).

|                              | Low AMED score<br>and low PUFAs | Low AMED score<br>and high PUFAs | High AMED score<br>and low PUFAs | High AMED score<br>and high PUFAs |
|------------------------------|---------------------------------|----------------------------------|----------------------------------|-----------------------------------|
| <b>Lung cancer risk</b>      |                                 |                                  |                                  |                                   |
| Cases/Total                  | 224/21,484                      | 107/12,435                       | 73/11,695                        | 130/21,312                        |
| Model 1 (HR 95%CI)           | Reference                       | <b>0.80 (0.68, 0.94)</b>         | <b>0.53 (0.43, 0.66)</b>         | <b>0.53 (0.45, 0.63)</b>          |
| Model 2 (HR 95%CI)           | Reference                       | <b>0.80 (0.68, 0.94)</b>         | <b>0.64 (0.51, 0.80)</b>         | <b>0.65 (0.54, 0.77)</b>          |
| <b>Lung cancer mortality</b> |                                 |                                  |                                  |                                   |
| Cases/Total                  | 125/21,484                      | 59/12,435                        | 32/11,695                        | 63/21,312                         |
| Model 1 (HR 95%CI)           | Reference                       | <b>0.74 (0.60, 0.92)</b>         | <b>0.45 (0.33, 0.61)</b>         | <b>0.47 (0.37, 0.59)</b>          |
| Model 2 (HR 95%CI)           | Reference                       | <b>0.75 (0.60, 0.93)</b>         | <b>0.57 (0.42, 0.77)</b>         | <b>0.60 (0.47, 0.76)</b>          |

Abbreviations: AMED, Alternate Mediterranean Diet; PUFA, polyunsaturated fatty acid; HR, hazard ratio; CI, confidence interval.

Model 1 (minimally adjusted) was adjusted for age, sex, and total energy intake; model 2 (fully adjusted) was additionally adjusted for ethnicity, Townsend Deprivation Index, education level, smoking status, physical activity level, body mass index, and family history of lung cancer.

Data with *P* values below 0.05 are shown in bold type.

**Supplemental Table 24.** Associations between total fat and fat subtypes and lung cancer outcomes (further adjusted for other dietary components).

|                         | Total fat         | SFAs %E           | PUFAs %E          | MUFAs %E          | TFAs %E           |
|-------------------------|-------------------|-------------------|-------------------|-------------------|-------------------|
| <b>Lung cancer risk</b> |                   |                   |                   |                   |                   |
| <b>Q1</b>               | Reference         | Reference         | Reference         | Reference         | Reference         |
| <b>Q2</b>               | 0.98 (0.85, 1.13) | 0.97 (0.84, 1.13) | 0.98 (0.85, 1.12) | 0.95 (0.82, 1.09) | 1.03 (0.89, 1.19) |

|                              |                   |                          |                          |                   |                   |
|------------------------------|-------------------|--------------------------|--------------------------|-------------------|-------------------|
| <b>Q3</b>                    | 0.96 (0.82, 1.11) | 0.97 (0.84, 1.13)        | <b>0.86 (0.74, 0.99)</b> | 0.98 (0.85, 1.14) | 1.09 (0.94, 1.26) |
| <b>Q4</b>                    | 1.05 (0.90, 1.22) | <b>1.17 (1.01, 1.36)</b> | <b>0.80 (0.69, 0.92)</b> | 0.94 (0.81, 1.09) | 1.11 (0.96, 1.28) |
| <b>q for trend</b>           | 0.590             | 0.076                    | <b>0.004</b>             | 0.590             | 0.196             |
| <b>Lung cancer mortality</b> |                   |                          |                          |                   |                   |
| <b>Q1</b>                    | Reference         | Reference                | Reference                | Reference         | Reference         |
| <b>Q2</b>                    | 0.97 (0.80, 1.17) | 0.94 (0.77, 1.15)        | 0.94 (0.79, 1.13)        | 0.90 (0.74, 1.08) | 0.97 (0.80, 1.18) |
| <b>Q3</b>                    | 0.92 (0.75, 1.13) | 0.94 (0.76, 1.15)        | 0.85 (0.70, 1.03)        | 0.97 (0.80, 1.18) | 1.07 (0.88, 1.30) |
| <b>Q4</b>                    | 1.00 (0.82, 1.23) | 1.14 (0.94, 1.39)        | <b>0.75 (0.62, 0.92)</b> | 0.87 (0.71, 1.07) | 1.05 (0.86, 1.27) |
| <b>q for trend</b>           | 0.938             | 0.405                    | 0.017                    | 0.458             | 0.620             |
| <b>Lung cancer survival</b>  |                   |                          |                          |                   |                   |
| <b>Q1</b>                    | Reference         | Reference                | Reference                | Reference         | Reference         |
| <b>Q2</b>                    | 1.01 (0.85, 1.22) | 1.02 (0.85, 1.23)        | 1.02 (0.86, 1.23)        | 1.02 (0.85, 1.22) | 1.00 (0.83, 1.20) |
| <b>Q3</b>                    | 0.99 (0.82, 1.20) | 1.03 (0.85, 1.24)        | 0.90 (0.75, 1.08)        | 0.95 (0.78, 1.14) | 1.06 (0.88, 1.27) |
| <b>Q4</b>                    | 0.96 (0.79, 1.16) | 1.02 (0.84, 1.23)        | 0.84 (0.70, 1.01)        | 0.91 (0.76, 1.11) | 1.05 (0.88, 1.26) |
| <b>q for trend</b>           | 0.760             | 0.876                    | 0.142                    | 0.671             | 0.760             |

Abbreviations: SFA, saturated fatty acid; MUFA, monounsaturated fatty acid; PUFA, polyunsaturated fatty acid; TFA, trans-fatty acid; %E, percentage of total energy.

Models were adjusted for age, sex, total energy intake, ethnicity, Townsend Deprivation Index, education level, smoking status, alcohol consumption, physical activity level, body mass index, and family history of lung cancer.

For the lung cancer survival analysis, age was defined as age at diagnosis, and the models were additionally adjusted for histological type.

Data with P values below 0.05 are shown in bold type.

q for trend were calculated using the Benjamini-Hochberg procedure across the five specific dietary fats to account for multiple comparisons.

**Supplemental Table 25.** Associations between isocaloric substitution of saturated fatty acids with unsaturated fatty acids and lung cancer outcomes (further adjusted for other dietary components).

|                              | HR 95%CI                  |                           | P value           |
|------------------------------|---------------------------|---------------------------|-------------------|
|                              | Substitution of 1% energy | Substitution of 5% energy |                   |
| <b>Lung cancer risk</b>      |                           |                           |                   |
| PUFAs for SFAs               | <b>0.92 (0.88, 0.96)</b>  | <b>0.66 (0.54, 0.82)</b>  | <b>&lt; 0.001</b> |
| MUFAs for SFAs               | 0.98 (0.93, 1.03)         | 0.90 (0.69, 1.16)         | 0.411             |
| <b>Lung cancer mortality</b> |                           |                           |                   |
| PUFAs for SFAs               | <b>0.92 (0.87, 0.98)</b>  | <b>0.66 (0.50, 0.89)</b>  | <b>0.006</b>      |
| MUFAs for SFAs               | 0.97 (0.91, 1.04)         | 0.87 (0.62, 1.25)         | 0.460             |
| <b>Lung cancer survival</b>  |                           |                           |                   |
| PUFAs for SFAs               | 0.99 (0.93, 1.04)         | 0.93 (0.71, 1.23)         | 0.626             |
| MUFAs for SFAs               | 1.01 (0.95, 1.07)         | 1.04 (0.76, 1.41)         | 0.827             |

Abbreviations: AMED, Alternate Mediterranean Diet; MUFA, monounsaturated fatty acid; PUFA, polyunsaturated fatty acid; SFA, saturated fatty acid; HR, hazard ratio; CI, confidence interval.

Models were adjusted for age, sex, total energy intake, ethnicity, Townsend Deprivation Index, education level, smoking status, alcohol consumption, physical activity level, body mass index, and family history of lung cancer.

For the lung cancer survival analysis, age was defined as age at diagnosis, and the models were additionally adjusted for histological type.

Data with *P* values below 0.05 are shown in bold type.

## Supplemental Table 26. Stratified analyses by key factors.

### (A) Alternate Mediterranean Diet (AMED) score

|                                | Lung cancer risk  |                          | Lung cancer mortality |                          | Lung cancer survival |                          |
|--------------------------------|-------------------|--------------------------|-----------------------|--------------------------|----------------------|--------------------------|
|                                | HR (95% CI)       | <i>P</i> for interaction | HR (95% CI)           | <i>P</i> for interaction | HR (95% CI)          | <i>P</i> for interaction |
| <b>Sex</b>                     |                   | 0.751                    |                       | 0.991                    |                      | 0.464                    |
| Female                         | 0.90 (0.87, 0.94) |                          | 0.89 (0.84, 0.94)     |                          | 0.97 (0.92, 1.02)    |                          |
| Male                           | 0.89 (0.85, 0.93) |                          | 0.89 (0.84, 0.94)     |                          | 0.99 (0.94, 1.05)    |                          |
| <b>Age</b>                     |                   | 0.401                    |                       | 0.315                    |                      | 0.393                    |
| <= median                      | 0.89 (0.84, 0.95) |                          | 0.87 (0.80, 0.95)     |                          | 0.93 (0.79, 1.10)    |                          |
| > median                       | 0.91 (0.88, 0.94) |                          | 0.90 (0.86, 0.94)     |                          | 0.99 (0.95, 1.03)    |                          |
| <b>Ethnicity</b>               |                   | 0.878                    |                       | 0.132                    |                      | 0.060                    |
| White                          | 0.90 (0.87, 0.92) |                          | 0.88 (0.85, 0.92)     |                          | 0.98 (0.94, 1.01)    |                          |
| Non-White                      | 0.91 (0.76, 1.09) |                          | 1.13 (0.88, 1.46)     |                          | 1.84 (1.13, 2.97)    |                          |
| <b>Education level</b>         |                   | 0.727                    |                       | 0.346                    |                      | 0.065                    |
| Less than high school          | 0.91 (0.85, 0.98) |                          | 0.92 (0.84, 1.01)     |                          | 1.05 (0.97, 1.14)    |                          |
| High school or equivalent      | 0.89 (0.86, 0.93) |                          | 0.89 (0.84, 0.94)     |                          | 0.97 (0.92, 1.02)    |                          |
| College or above               | 0.89 (0.84, 0.94) |                          | 0.85 (0.79, 0.92)     |                          | 0.95 (0.88, 1.01)    |                          |
| <b>TDI</b>                     |                   | 0.207                    |                       | 0.529                    |                      | 0.361                    |
| <= median                      | 0.94 (0.89, 0.98) |                          | 0.92 (0.86, 0.98)     |                          | 0.96 (0.91, 1.03)    |                          |
| > median                       | 0.92 (0.88, 0.95) |                          | 0.91 (0.87, 0.96)     |                          | 1.00 (0.96, 1.05)    |                          |
| <b>Alcohol consumption</b>     |                   | 0.275                    |                       | 0.241                    |                      | 0.513                    |
| Never or moderate              | 0.91 (0.88, 0.95) |                          | 0.90 (0.86, 0.95)     |                          | 0.99 (0.95, 1.04)    |                          |
| Excessive                      | 0.87 (0.83, 0.92) |                          | 0.86 (0.80, 0.92)     |                          | 0.97 (0.91, 1.03)    |                          |
| <b>Physical activity level</b> |                   | 0.655                    |                       | 0.570                    |                      | 0.271                    |
| Insufficiently active          | 0.90 (0.84, 0.97) |                          | 0.88 (0.80, 0.96)     |                          | 0.92 (0.84, 1.01)    |                          |
| Sufficiently active            | 0.90 (0.87, 0.93) |                          | 0.89 (0.85, 0.93)     |                          | 0.99 (0.95, 1.03)    |                          |
| <b>BMI</b>                     |                   | 0.057                    |                       | 0.054                    |                      | 0.333                    |
| < 25                           | 0.87 (0.82, 0.91) |                          | 0.81 (0.76, 0.87)     |                          | 0.94 (0.88, 1.00)    |                          |
| 25-<30                         | 0.90 (0.86, 0.94) |                          | 0.89 (0.84, 0.95)     |                          | 0.98 (0.93, 1.04)    |                          |
| >=30                           | 0.95 (0.89, 1.01) |                          | 0.97 (0.89, 1.06)     |                          | 1.08 (0.99, 1.18)    |                          |

### (B) PUFAs intake

|            | Lung cancer risk  |                          | Lung cancer mortality |                          | Lung cancer survival |                          |
|------------|-------------------|--------------------------|-----------------------|--------------------------|----------------------|--------------------------|
|            | HR (95% CI)       | <i>P</i> for interaction | HR (95% CI)           | <i>P</i> for interaction | HR (95% CI)          | <i>P</i> for interaction |
| <b>Sex</b> |                   | 0.456                    |                       | 0.818                    |                      | 0.412                    |
| Female     | 0.95 (0.91, 0.99) |                          | 0.93 (0.88, 0.98)     |                          | 0.98 (0.93, 1.04)    |                          |
| Male       | 0.94 (0.90, 0.98) |                          | 0.93 (0.88, 0.99)     |                          | 0.96 (0.91, 1.01)    |                          |
| <b>Age</b> |                   | 0.582                    |                       | 0.057                    |                      | 0.235                    |

|                                |                   |                   |                   |
|--------------------------------|-------------------|-------------------|-------------------|
| <= median                      | 0.94 (0.89, 1.00) | 0.98 (0.91, 1.06) | 1.12 (0.95, 1.31) |
| > median                       | 0.94 (0.91, 0.97) | 0.91 (0.87, 0.95) | 0.97 (0.93, 1.01) |
| <b>Ethnicity</b>               | 0.296             | 0.672             | 0.473             |
| White                          | 0.95 (0.92, 0.98) | 0.93 (0.90, 0.97) | 0.97 (0.94, 1.01) |
| Non-White                      | 0.86 (0.72, 1.01) | 0.87 (0.68, 1.12) | 0.87 (0.59, 1.29) |
| <b>Education level</b>         | 0.802             | 0.276             | 0.929             |
| Less than high school          | 0.95 (0.89, 1.01) | 0.90 (0.83, 0.99) | 1.00 (0.93, 1.08) |
| High school or equivalent      | 0.95 (0.91, 0.99) | 0.96 (0.91, 1.02) | 0.97 (0.92, 1.02) |
| College or above               | 0.92 (0.87, 0.98) | 0.89 (0.82, 0.97) | 0.97 (0.90, 1.04) |
| <b>TDI</b>                     | 0.933             | 0.950             | 0.183             |
| <= median                      | 0.93 (0.89, 0.98) | 0.92 (0.86, 0.98) | 0.94 (0.88, 1.00) |
| > median                       | 0.94 (0.90, 0.98) | 0.93 (0.88, 0.98) | 1.00 (0.95, 1.04) |
| <b>Alcohol consumption</b>     | 0.666             | 0.791             | 0.251             |
| Never or moderate              | 0.95 (0.91, 0.98) | 0.93 (0.89, 0.98) | 0.99 (0.94, 1.03) |
| Excessive                      | 0.94 (0.89, 0.99) | 0.93 (0.87, 1.00) | 0.95 (0.89, 1.01) |
| <b>Physical activity level</b> | 0.913             | 0.891             | 0.629             |
| Insufficiently active          | 0.94 (0.88, 1.00) | 0.92 (0.84, 1.01) | 0.95 (0.87, 1.04) |
| Sufficiently active            | 0.94 (0.91, 0.98) | 0.93 (0.89, 0.97) | 0.98 (0.94, 1.02) |
| <b>BMI</b>                     | 0.430             | 0.281             | 0.600             |
| < 25                           | 0.92 (0.88, 0.97) | 0.90 (0.84, 0.97) | 0.97 (0.91, 1.03) |
| 25-<30                         | 0.94 (0.90, 0.99) | 0.92 (0.84, 0.98) | 0.93 (0.87, 0.98) |
| >=30                           | 0.97 (0.91, 1.03) | 0.98 (0.91, 1.06) | 1.04 (0.97, 1.11) |

### (C) Cross classification of Mediterranean diet and PUFAs intake

|                                | <b>Lung cancer risk</b>         | <b>Lung cancer mortality</b>    | <b>Lung cancer survival</b>     |
|--------------------------------|---------------------------------|---------------------------------|---------------------------------|
|                                | <b><i>P</i> for interaction</b> | <b><i>P</i> for interaction</b> | <b><i>P</i> for interaction</b> |
| <b>Sex</b>                     | 0.063                           | 0.065                           | 0.348                           |
| <b>Age</b>                     | 0.655                           | 0.129                           | 0.691                           |
| <b>Ethnicity</b>               | 0.426                           | 0.418                           | 0.174                           |
| <b>Education level</b>         | 0.334                           | 0.257                           | 0.458                           |
| <b>TDI</b>                     | 0.815                           | 0.392                           | 0.211                           |
| <b>Alcohol consumption</b>     | 0.916                           | 0.696                           | 0.510                           |
| <b>Physical activity level</b> | 0.480                           | 0.584                           | 0.308                           |
| <b>BMI</b>                     | 0.117                           | 0.102                           | 0.065                           |

Abbreviations: AMED, Alternate Mediterranean Diet; PUFA, polyunsaturated fatty acid; TDI, Townsend Deprivation Index; HR, hazard ratio; CI, confidence interval.

Models were adjusted for age, sex, total energy intake, ethnicity, Townsend Deprivation Index, education level, smoking status, alcohol consumption, physical activity level, body mass index, and family history of lung cancer.

For the lung cancer survival analysis, age was defined as age at diagnosis, and the models were additionally adjusted for histological type.

The median of age is 57 years, and the median of TDI is -2.32.

NA, not available. The subdistribution hazard ratio could not be reliably estimated for this subgroup due to the limited number of events.

**Supplemental Figure 1.** Flowchart of study participants from the UK Biobank.

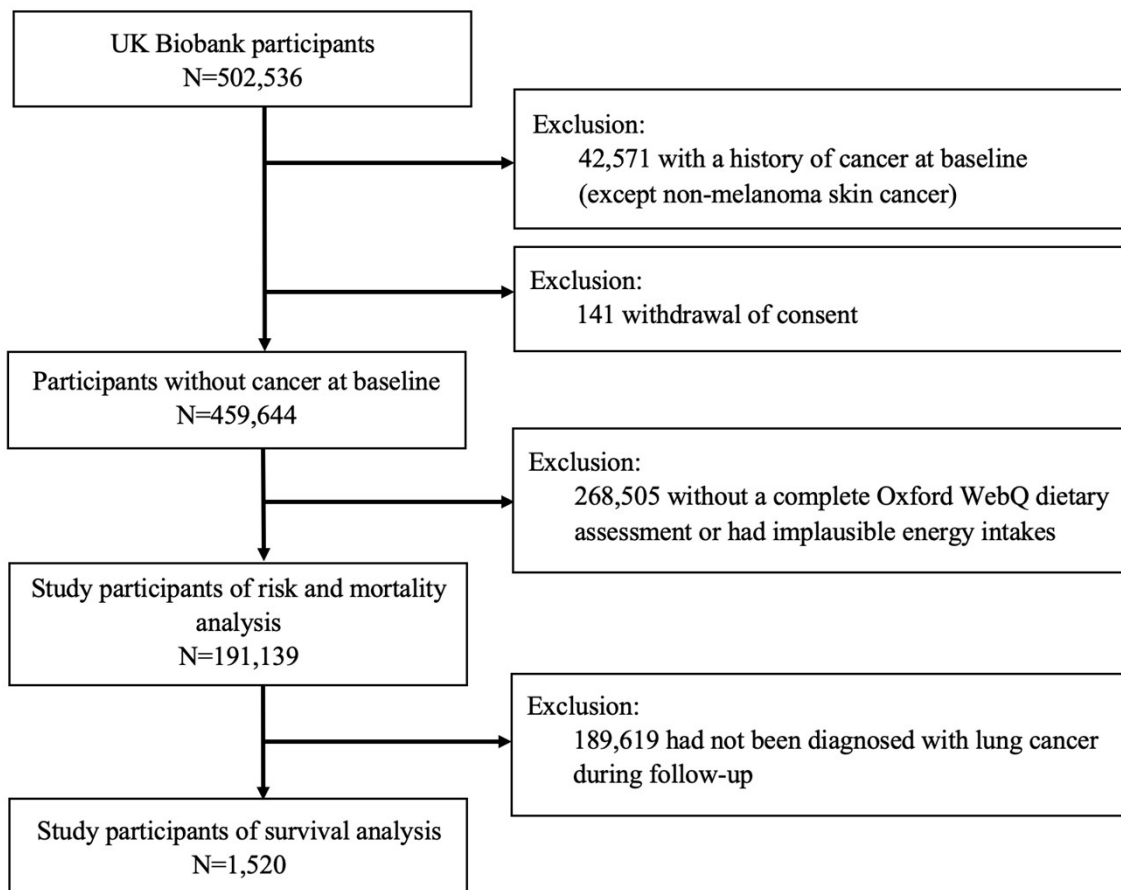

Supplement: d6fo00080k1.pdf [file d6fo00080k1.pdf]
